# Supplementary material for: Metal exchange study of pyrogallol[4]arene based dimers
Source: Royal Society of Chemistry journal article supplement (doi:10.1039/c6ce00639f), 2016-01-01
Supplement: c6ce00639f1.pdf [file c6ce00639f1.pdf]

## Supporting Information

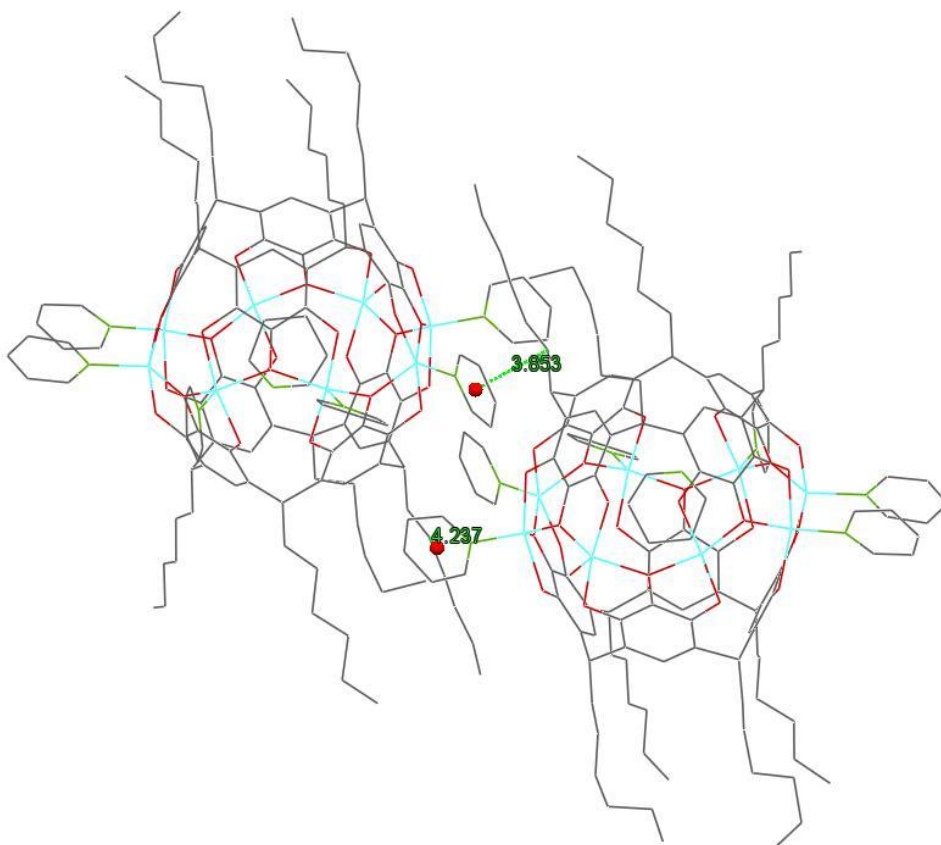

Figure S1: Packing diagram of zinc-seamed C-hexylpyrogallol[4]arene dimer showing CH... $\pi$  interactions between the pyridine ligand and the hexyl tails
